# Supplementary material
Source: MDPI journal article supplement (https://www.mdpi.com/2073-4344/8/11/568)
Supplement: s1 [file s1]

# Supplementary Materials: TiO<sub>2</sub>-SiO<sub>2</sub>-PMMA Terpolymer Floating Device for the Photocatalytic Remediation of Water and Gas Phase Pollutants

Valentina Sabatini \*, Luca Rimoldi \*, Laura Tripaldi, Daniela Meroni \*, Hermes Farina, Marco Ortenzi and Silvia Ardizzone

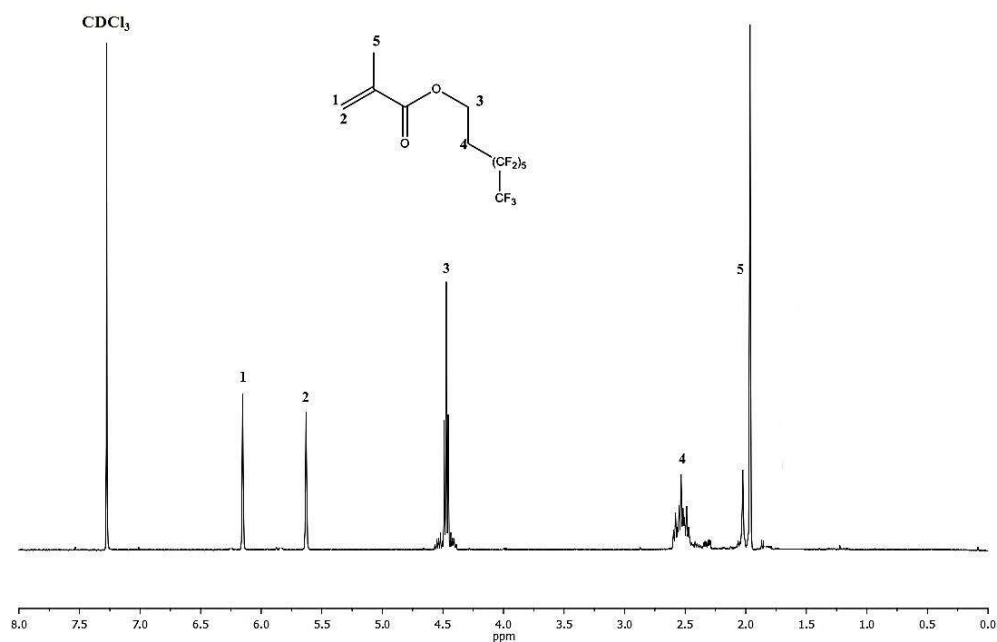

Figure S1. <sup>1</sup>H NMR spectrum of POMA monomer.

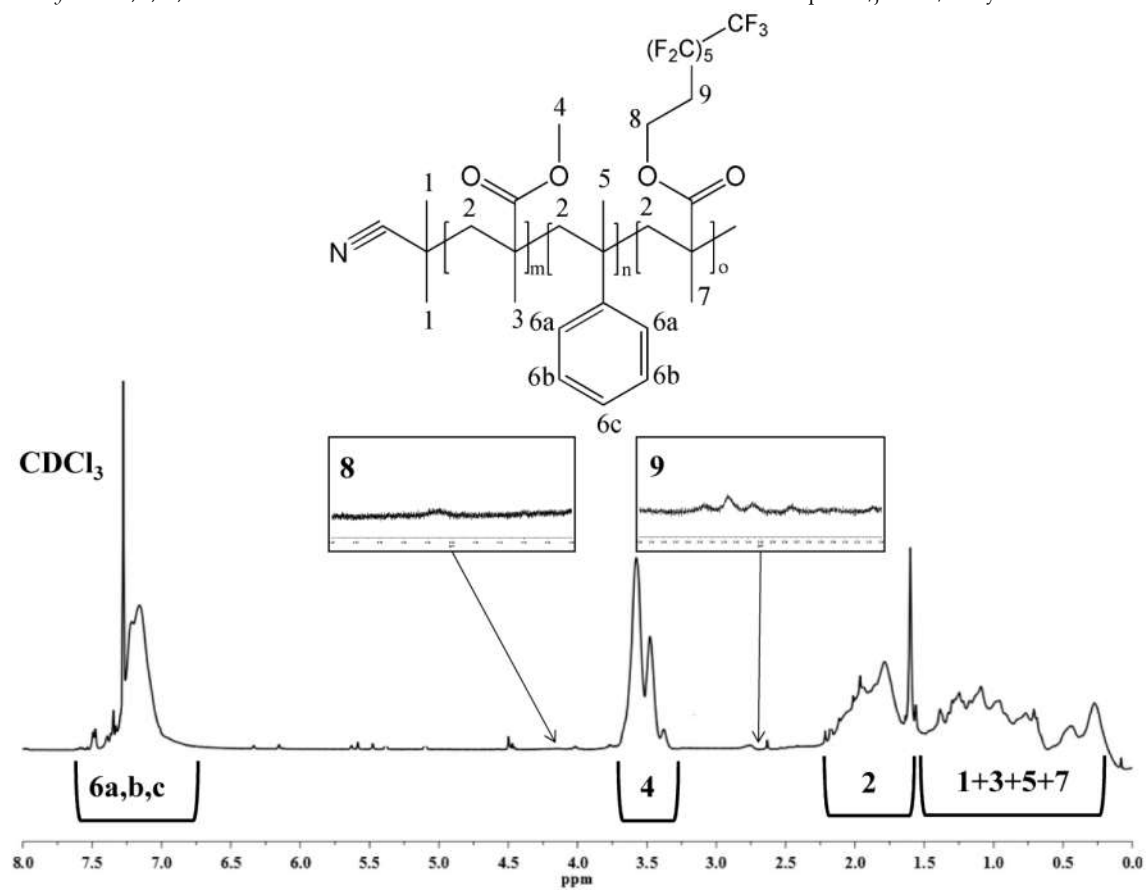Figure S2.  $^1\text{H}$  NMR spectrum of MMA- $\alpha$ -methylstyrene-POMA polymer.

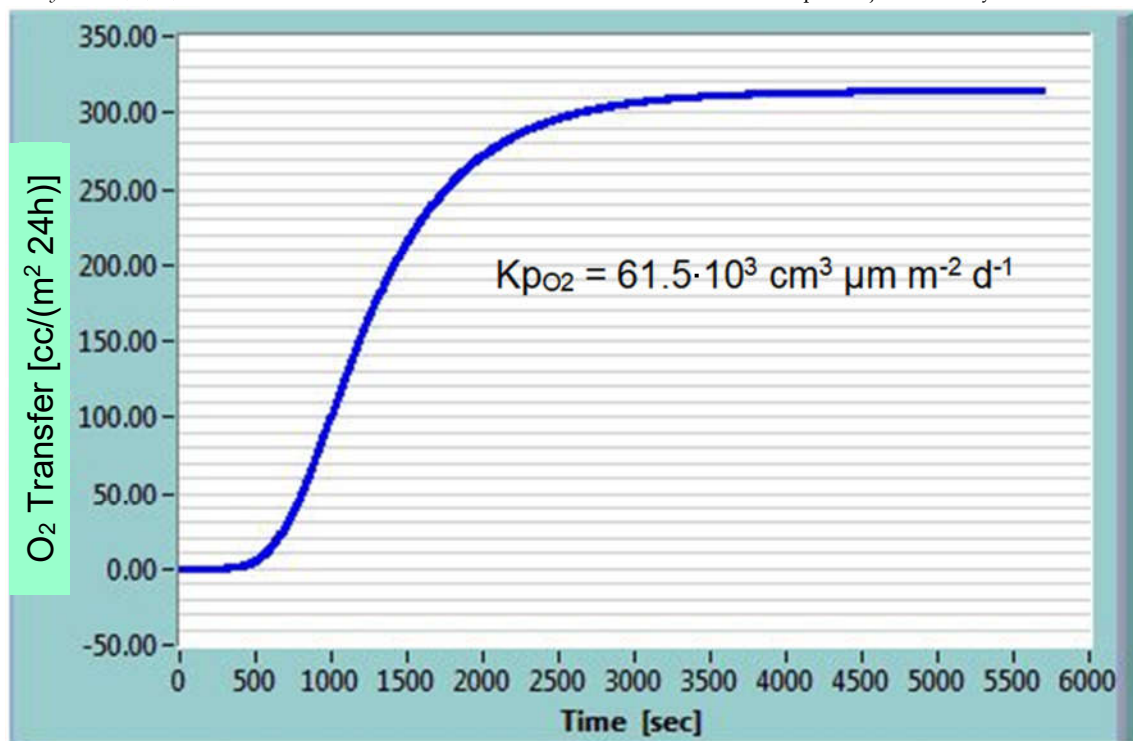

Figure S3. O<sub>2</sub> transfer with respect to time of the synthesized MMA\_α-methylstyrene\_POMA.

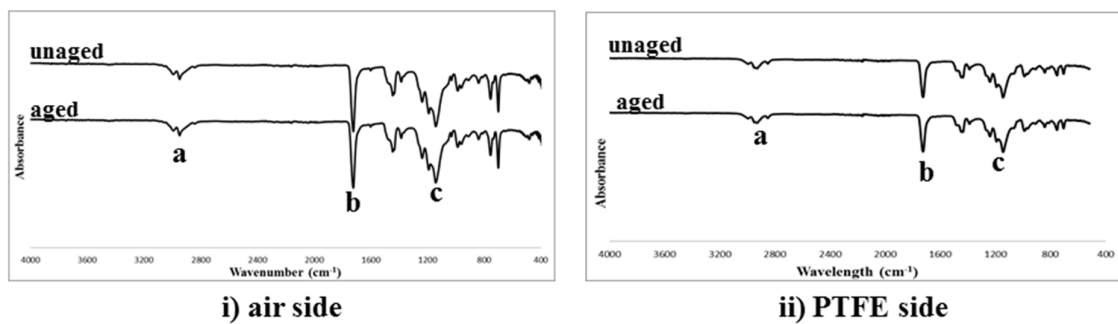

Figure S4. FT-IR spectra of MMA\_α-methylstyrene\_POMA collected before and after the UV stability test at the air (i) and PTFE (ii) side.

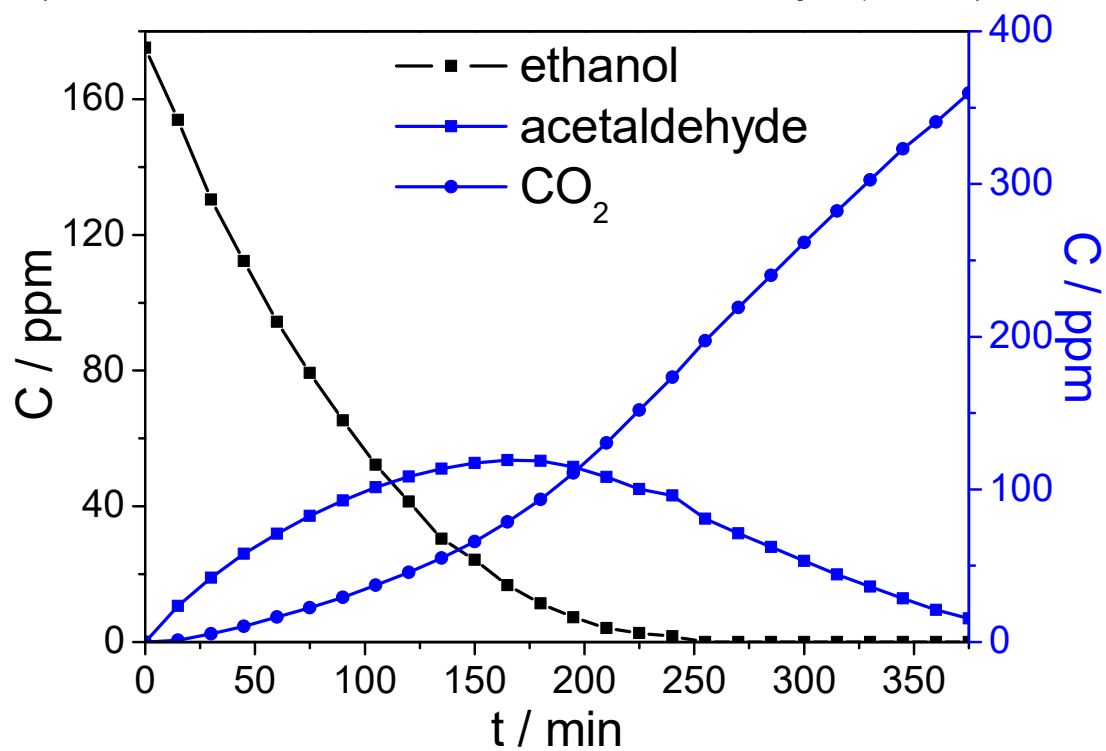

Figure S5. Ethanol disappearance and acetaldehyde and CO<sub>2</sub> formation during the photocatalytic test under UV irradiation.

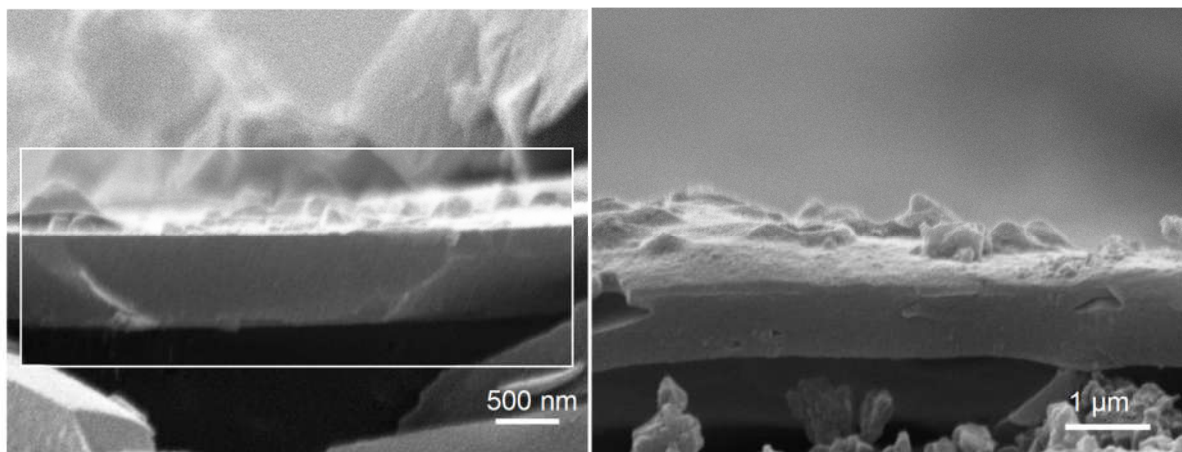

Figure S6. Cross-sectional SEM images after UV irradiation for over 15 hours in working conditions.
